# Supplementary material
Source: PubMed Central journal article supplement (PMC5710507)
Supplement: jamaoncol-3-1345-s001.pdf [file jamaoncol-3-1345-s001.pdf]

## Supplementary Online Content

Unger JM, LeBlanc M, Blanke CD. The effect of positive SWOG treatment trials on survival of patients with cancer in the US population. *JAMA Oncol*. Published online June 5, 2017. doi:10.1001/jamaoncol.2017.0762

**eFigure 1.** Survival Functions Indicating Life-Years Gained Calculations for a Representative Positive SWOG Phase III Trial (S9008) by Age Category

**eFigure 2.** Study Flow Diagram Indicating the Disposition of the Studies Examined and Their Cancer Type

**eFigure 3.** Life-Years Gained by Treatment Duration and Effectiveness

**eMethods.** Supplemental Methods

**eTable.** SWOG Studies With Statistically Significant Benefit of Experimental Therapy on Overall Survival

This supplementary material has been provided by the authors to give readers additional information about their work.

**eFigure 1.** Survival Functions Indicating Life-Years Gained Calculations for a Representative Positive SWOG Phase III Trial (S9008) by Age Category. Life-years gained is the difference in the area under the survival curve between individuals receiving standard versus experimental therapy. The survival functions for the effect of the new treatment is based on trial parameters; residual life years continue to accrue beyond the treatment impact period (i.e. 5 years) given more individuals are alive. Survival in the post-treatment effect period is assumed to exhibit exponential decay, with maximum survival at the half-life using life table data, out to the end of the estimation period.

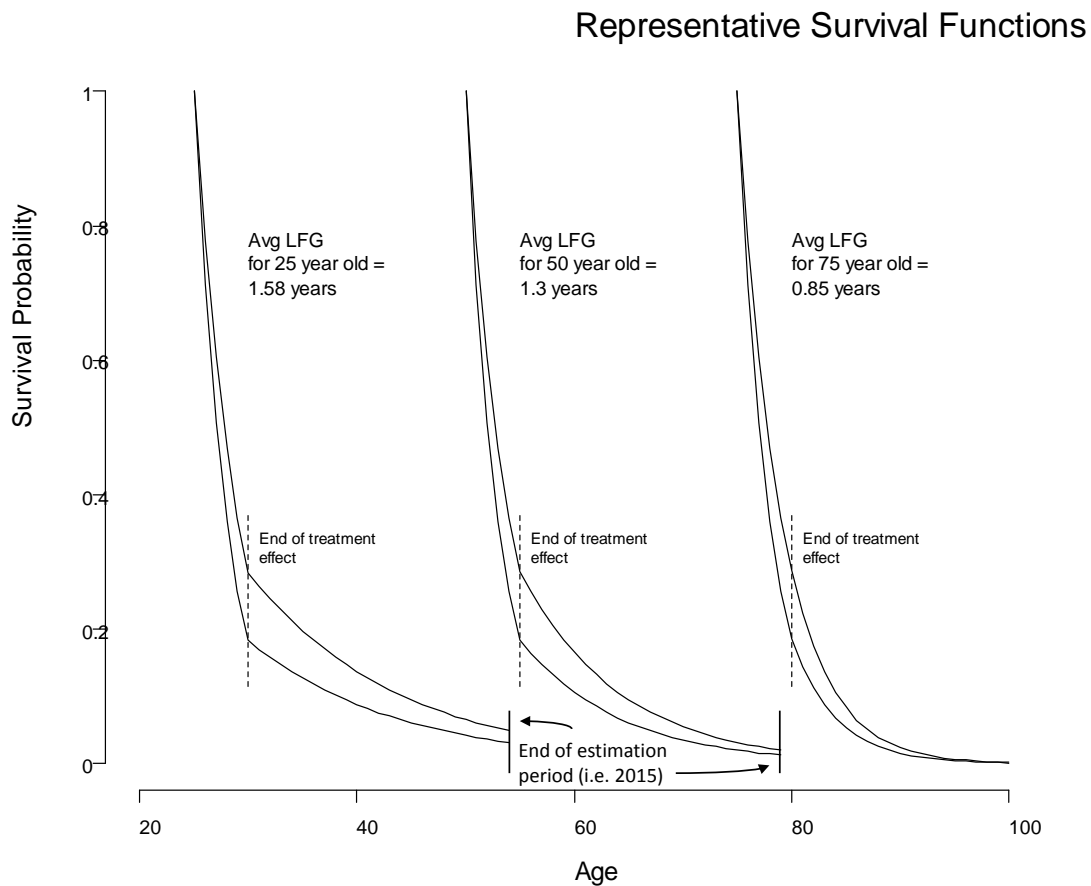

**eFigure 2.** Study Flow Diagram Indicating the Disposition of the Studies Examined and Their Cancer Type

## Study Flow Diagram

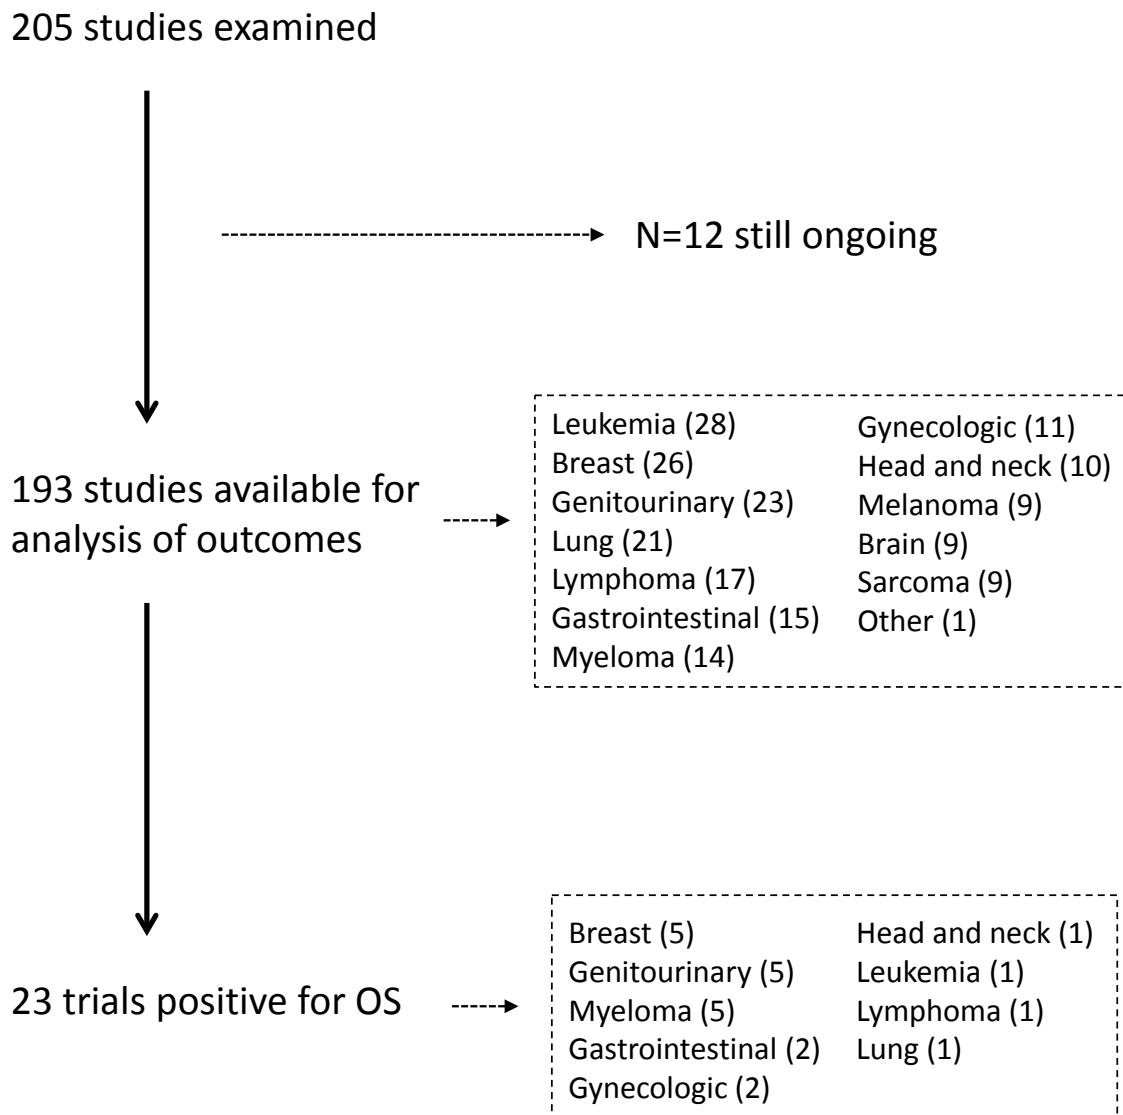

**eFigure 3.** Life-Years Gained by Treatment Duration and Effectiveness. Each dot indicates an estimate of life-years gained across all 23 positive trials based on the duration of the treatment effect (3 to 7 years by one year intervals), the efficiency of the translation of the treatment effect to the treatment population (75% to 100%), and the weight parameter (uniformly within five category ranges of 1:10, 11:50, 50:100, 100:200, and 200:1000).

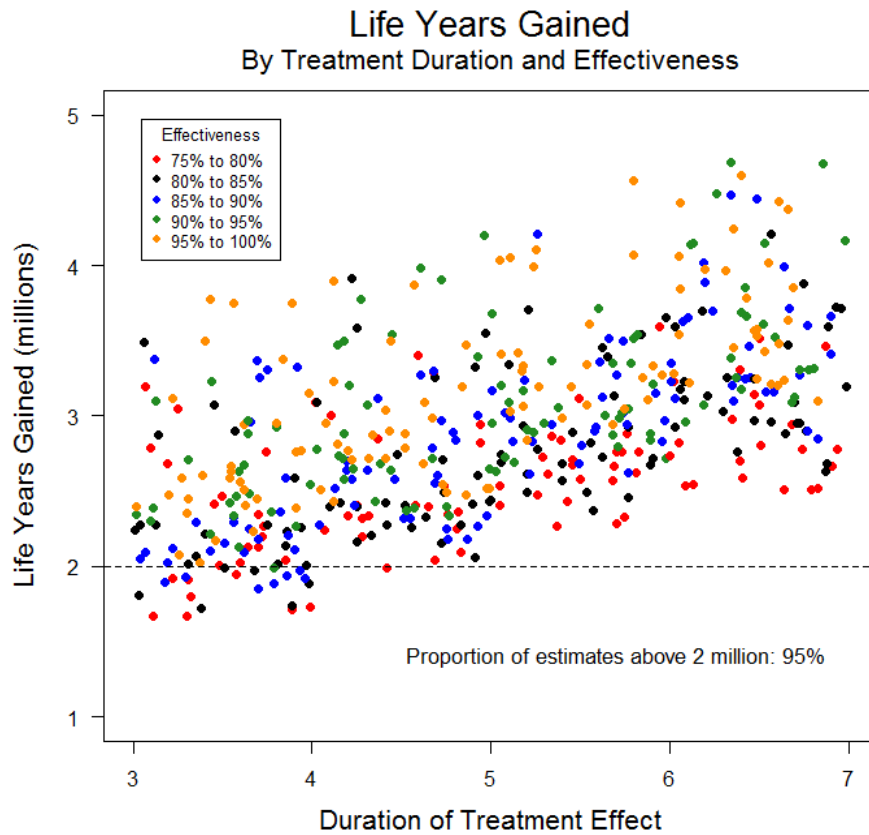

**eMethods.** Supplemental Methods

**Methods regarding adjusting hazard functions to better reflect population cancer outcomes**

An adjustment factor was derived by identifying the relative benefit of trial participation on OS from the data used to generate Figure 4 in Unger, 2014. The relative benefit of trial participation differed by year (and was especially strong in the first year but waned over time) and according to prognosis. We estimated the relative benefit for each year out to 5 years and according to prognosis in 10% increments.

### **Methods regarding calculation of years of life lost due to cancer in U.S.**

To estimate years of life due to cancer in the United States, we relied on data from multiple reports.

Horn and Sondik (*American Journal of Public Health*, 1989; 79(11); 1490-1993) estimated the years of life lost due to cancer in the United States in 1970 as 5,303,668, and in 1984 as 6,881,281. Data from the most recent Cancer Trends Progress Report from the National Institutes of Health indicates that 9,186,000 life years were lost due to cancer in the United States in 2013. A simple linear projection regression line was estimated from these data points, and the area under the curve from 1969-2016 was estimated as the total life years lost due to cancer during the period, giving an estimate of 356,829,000.

### **References:**

- Horn JW, Sondik EJ. Person-years of life lost due to cancer in the United States, 1970 and 1984. *American Journal of Public Health* November 1989: Vol. 79, No. 11, pp. 1490-1493.
- Cancer Trends Progress Report, National Cancer Institute, NIH, DHHS, Bethesda, MD, January 2017, <http://progressreport.cancer.gov>

**eTable.** SWOG Studies With Statistically Significant Benefit of Experimental Therapy on Overall Survival

| Cancer Study No.                | Major Eligibility Criteria                                                                       | Treatment Comparison (Experimental therapy vs. Standard therapy)                                     | Accrual Years | 1st Year of Publication | Std. Arm Hazard <sup>a</sup> | HR                | N    |
|---------------------------------|--------------------------------------------------------------------------------------------------|------------------------------------------------------------------------------------------------------|---------------|-------------------------|------------------------------|-------------------|------|
| Myeloma (SWG01) <sup>14</sup>   | Multiple myeloma; previously untreated                                                           | Melphalan + prednisone vs. melphalan alone                                                           | 1965-1968     | 1969                    | 0.678 <sup>1</sup>           | 1.60 <sup>1</sup> | 183  |
| Breast (SWG02) <sup>15</sup>    | Carcinoma; disseminated (refractory)                                                             | Adriamycin vs. oral nitrosoureas                                                                     | 1972-1972     | 1974                    | 2.870 <sup>1</sup>           | 1.87 <sup>1</sup> | 110  |
| Breast (S7436) <sup>16</sup>    | Modified or radical mastectomy, node(+), no metastatic disease                                   | CMFVP vs. intermittent L-PAM                                                                         | 1975-1979     | 1982                    | 0.110 <sup>1</sup>           | 1.76 <sup>1</sup> | 364  |
| Myeloma (S7704) <sup>17</sup>   | Multiple myeloma; previously untreated                                                           | VMCP and (VCAP or VBAP) vs. melphalan + prednisone                                                   | 1977-1979     | 1983                    | 0.422 <sup>1</sup>           | 1.65 <sup>1</sup> | 275  |
| Testis (S7817) <sup>18</sup>    | Germ cell; metastatic; no prior chemotherapy                                                     | High dose cisplatin + vinblastine/bleomycin vs. low dose cisplatin + vinblastine/bleomycin           | 1978-1981     | 1984                    | 0.269 <sup>2</sup>           | 2.33 <sup>2</sup> | 114  |
| Prostate (S8494) <sup>19</sup>  | Carcinoma; previously untreated, stage D2                                                        | Leuprolone + flutamide vs. leuprolide alone                                                          | 1985-1986     | 1988                    | 0.709 <sup>1</sup>           | 1.28 <sup>1</sup> | 603  |
| Ovarian (S8501) <sup>20</sup>   | Epithelial; previously untreated, stage III                                                      | Intraperitoneal cisplatin + cyclophosphamide vs. intravenous cisplatin + cyclophosphamide            | 1986-1992     | 1995                    | 0.236 <sup>2</sup>           | 1.32 <sup>3</sup> | 546  |
| Colon (S8591) <sup>21</sup>     | Adenoma; resected; stage C                                                                       | Levamisole + 5FU vs. levamisole or observation                                                       | 1984-1987     | 1990                    | 0.182 <sup>2</sup>           | 1.49 <sup>3</sup> | 971  |
| Myeloma (S8624) <sup>22</sup>   | Multiple myeloma; previously untreated                                                           | Chemotherapy plus dose intensive corticosteroids vs. chemotherapy plus standard dose corticosteroids | 1987-1990     | 1992                    | 0.356 <sup>2</sup>           | 1.32 <sup>2</sup> | 507  |
| Bladder (S8710) <sup>23,c</sup> | Transitional cell carcinoma; stages T2–T4A                                                       | M-VAC plus cystectomy vs. cystectomy alone                                                           | 1988-1997     | 2001                    | 0.223 <sup>2</sup>           | 1.33 <sup>3</sup> | 307  |
| NHL (S8736) <sup>24</sup>       | Intermediate and high grade NHL; stage I-IIe (non-bulky disease)                                 | CHOP plus radiotherapy vs. CHOP alone                                                                | 1988-1995     | 1996                    | 0.070 <sup>2</sup>           | 1.70 <sup>3</sup> | 401  |
| Cervix (S8797) <sup>25,d</sup>  | Squamous cell, adeno-, or adenosquamous carcinoma; stages IA2, IB, or IIA                        | Cisplatin/5-FU plus radiation therapy vs. radiation therapy alone                                    | 1990-1996     | 1999                    | 0.101 <sup>2</sup>           | 1.96 <sup>3</sup> | 243  |
| Breast (S8814) <sup>26</sup>    | Adenocarcinoma; hormone-receptor positive; stage T1-T3; postmenopausal; node positive (N1 or N2) | CAF followed by tamoxifen or CAF with concurrent tamoxifen vs. tamoxifen alone                       | 1989-1995     | 1997                    | 0.041 <sup>2</sup>           | 1.20 <sup>3</sup> | 1477 |
| HN (S8892) <sup>27</sup>        | Nasopharyngeal; stage III-IV(M0)                                                                 | Cisplatin/5-FU plus radiation therapy vs. radiation therapy alone                                    | 1989-1996     | 1996                    | 0.257 <sup>2</sup>           | 2.50 <sup>3</sup> | 148  |
| Breast (S8897) <sup>28,d</sup>  | Adenocarcinoma; stage T1-T3a; node negative                                                      | CAF vs. CMF                                                                                          | 1989-1993     | 1995                    | 0.020 <sup>2</sup>           | 1.19 <sup>3</sup> | 2695 |
| Renal (S8949) <sup>29</sup>     | Carcinoma; metastatic                                                                            | Nephrectomy plus interferon alfa-2b vs. interferon alfa-2b alone                                     | 1989-1998     | 2000                    | 1.296 <sup>2</sup>           | 1.30 <sup>2</sup> | 241  |
| Gastric (S9008) <sup>30</sup>   | Adenocarcinoma; stage IB–IV (M0); prior en bloc surgery                                          | Surgery plus 5-FU/leucovorin/radiation therapy vs. surgery alone                                     | 1991-1998     | 2000                    | 0.340 <sup>2</sup>           | 1.35 <sup>3</sup> | 556  |
| Leukemia (S9126) <sup>31</sup>  | Acute myeloid leukemia; refractory/relapse or secondary                                          | Ara C-DNR plus CsA vs. Ara C-DNR alone                                                               | 1993-1998     | 1998                    | 1.742 <sup>2</sup>           | 1.28 <sup>3</sup> | 226  |
| Myeloma (S9210) <sup>32,e</sup> | Multiple myeloma; previously untreated                                                           | Prednisone 50 mg vs. prednisone 10 mg (for remission maintenance)                                    | 1993-1998     | 1998                    | 0.205 <sup>2</sup>           | 1.41 <sup>2</sup> | 126  |

|                                |                                                                                                 |                                                                            |                  |      |                    |                   |               |
|--------------------------------|-------------------------------------------------------------------------------------------------|----------------------------------------------------------------------------|------------------|------|--------------------|-------------------|---------------|
| NSCLC (S9308) <sup>33</sup>    | Any NSCLC; stage IIIB or IV                                                                     | Cisplatin plus vinorelbine vs. vinorelbine alone                           | 1993-1995        | 1997 | 2.070 <sup>2</sup> | 1.44 <sup>2</sup> | 415           |
| Prostate (S9916) <sup>34</sup> | Adenocarcinoma; advanced (metastatic) refractory                                                | Docetaxel plus estramustine vs. mitoxantrone plus prednisone               | 1999-2003        | 2004 | 0.714 <sup>2</sup> | 1.25 <sup>3</sup> | 684           |
| Breast (S0226) <sup>35</sup>   | Hormone-receptor positive; metastatic; postmenopausal; no prior systemic therapy                | Anastrozole and fulvestrant vs. anastrozole alone                          | 2004-2009        | 2011 | 0.224 <sup>2</sup> | 1.25 <sup>3</sup> | 695           |
| Myeloma (S0777) <sup>36</sup>  | Multiple myeloma; previously untreated; no intent to treat with autologous stem cell transplant | Bortezomib, lenalidomide, & dexamethasone vs. lenalidomide + dexamethasone | 2008-2012        | 2015 | 0.117 <sup>2</sup> | 1.50 <sup>3</sup> | 474           |
| <b>TOTAL (23 trials)</b>       |                                                                                                 |                                                                            | <b>1965-2012</b> |      |                    |                   | <b>12,361</b> |

HR = hazard ratio; OS = overall survival; CI = confidence interval; NHL = non-Hodgkin's lymphoma; VAD = vincristine, doxorubicin and dexamethasone; M-VAC = methotrexate, vinblastine, doxorubicin and cisplatin; CHOP = cyclophosphamide, doxorubicin, vincristine, and prednisone; 5-FU = fluorouracil; Ara C = Cytarabine; DNR = daunorubicin; CsA = cyclosporine-A; NSCLC = non-small cell lung cancer; CAF = cyclophosphamide, doxorubicin, and 5-fluorouracil; HN = head and neck; CMF = cyclophosphamide, methotrexate, and fluorouracil

a – Adjusted for a trial effect

1 – Calculated using overall survival point estimates from the published manuscript.

2 – Calculated using patient-level data from the SWOG database.

3 – Reported in the primary manuscript.

<sup>b</sup> HR estimate not reported; estimate calculated from primary manuscript dataset.

<sup>c</sup> The study was considered positive even though the p-value for the overall survival comparison was marginally greater than .05, based on the totality of the examinations of the overall survival endpoint.

<sup>d</sup> Study reported one-sided results per design specifications; reported as 2-sided here for consistency with other studies.

e – A median of 9 mos was added for induction to survival function; assumes 50% respond based on half of patients going on to maintenance

f – Limited to stage C
